# Supplementary material for: Echinacoside Protects Dopaminergic Neurons Through Regulating IL-6/JAK2/STAT3 Pathway in Parkinson’s Disease Model
Source: PubMed Central journal article supplement (PMC8914071; doi:10.3389/fphar.2022.848813), 2022-02-25

# Graphical Abstract

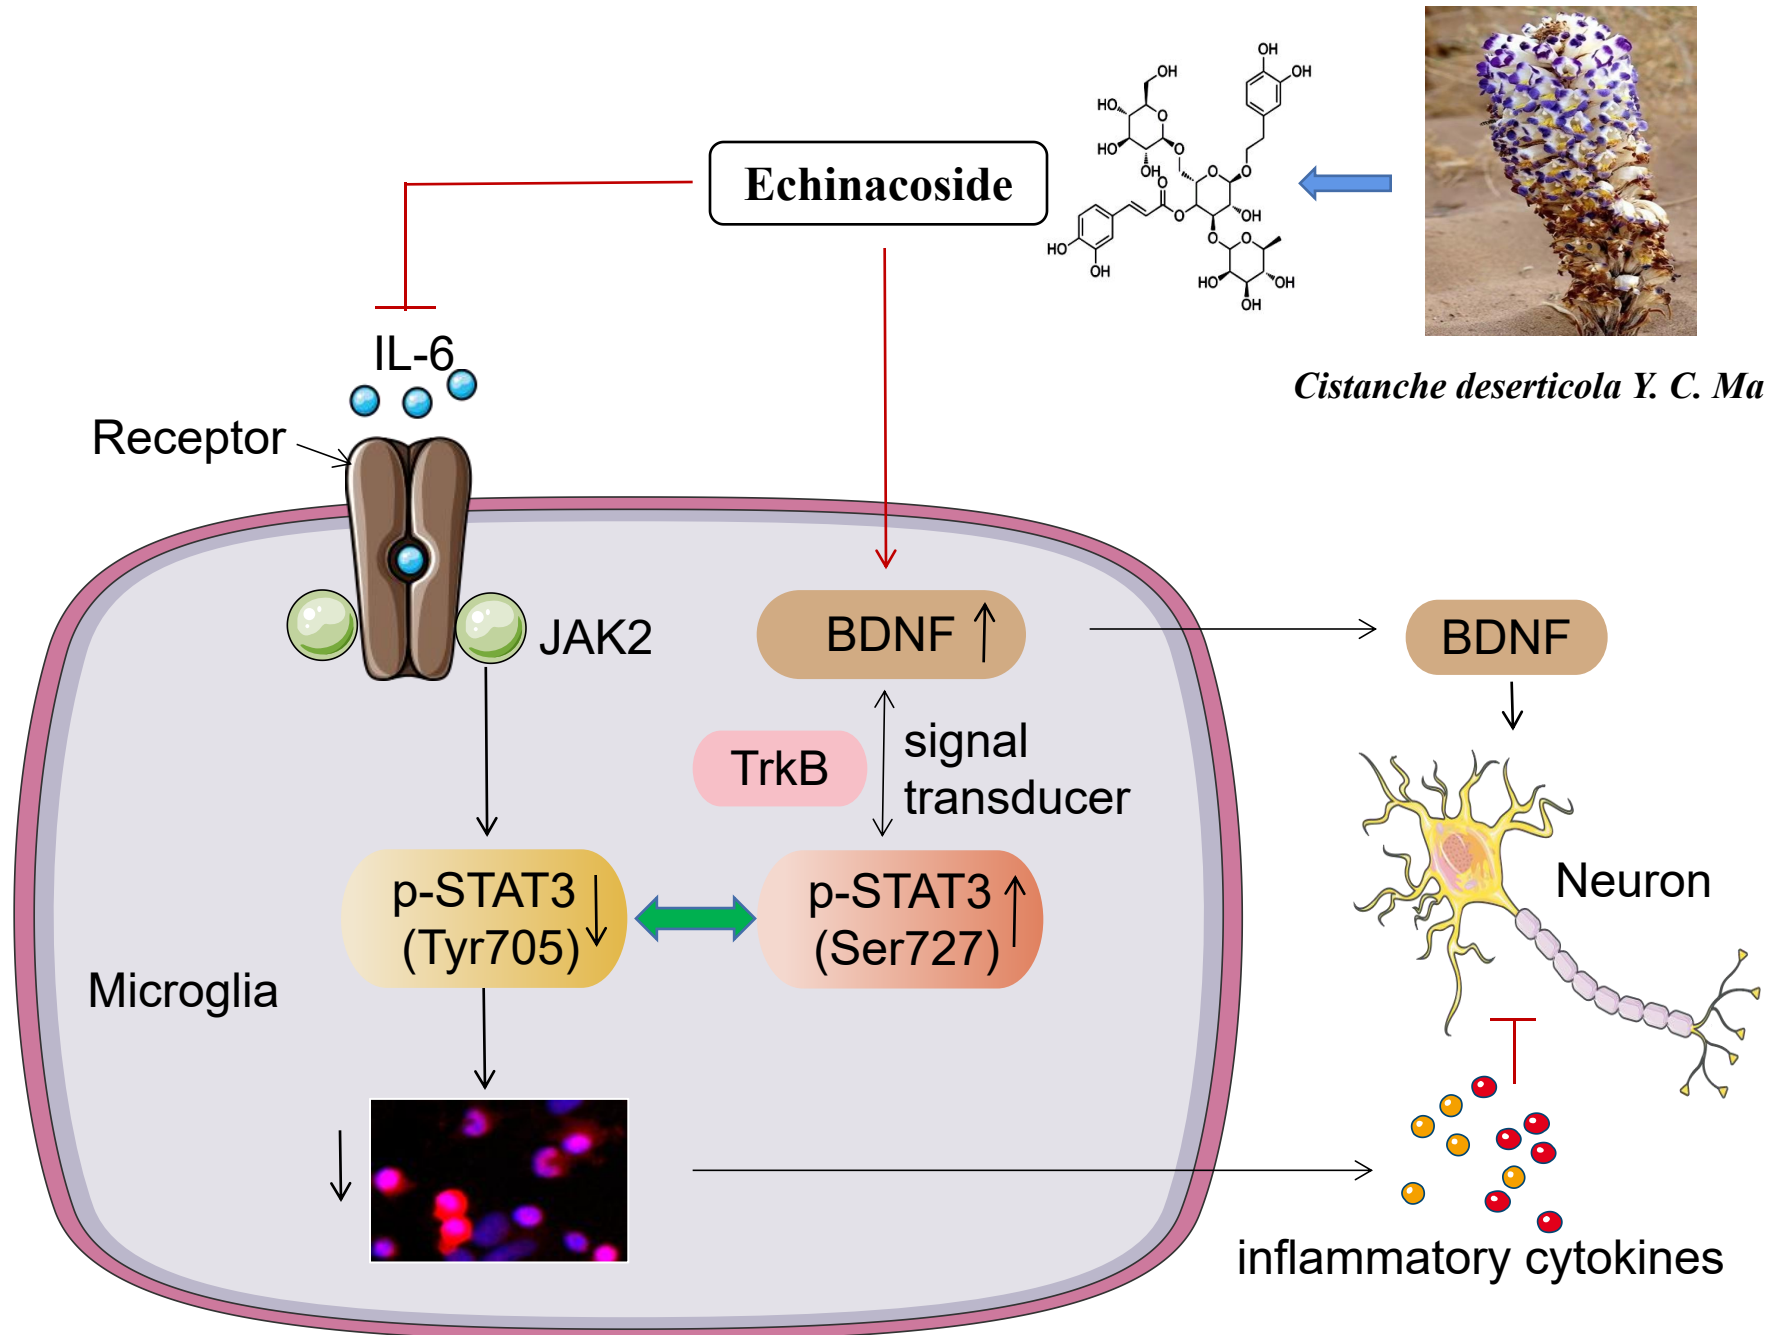

Supplement: DataSheet1.pdf [file DataSheet1.pdf]
