# Supplementary material for: Echinacoside Protects Dopaminergic Neurons Through Regulating IL-6/JAK2/STAT3 Pathway in Parkinson’s Disease Model
Source: PubMed Central journal article supplement (PMC8914071; doi:10.3389/fphar.2022.848813), 2022-02-25

**Supplement:**

Western blot with protein marker

Figure 2A

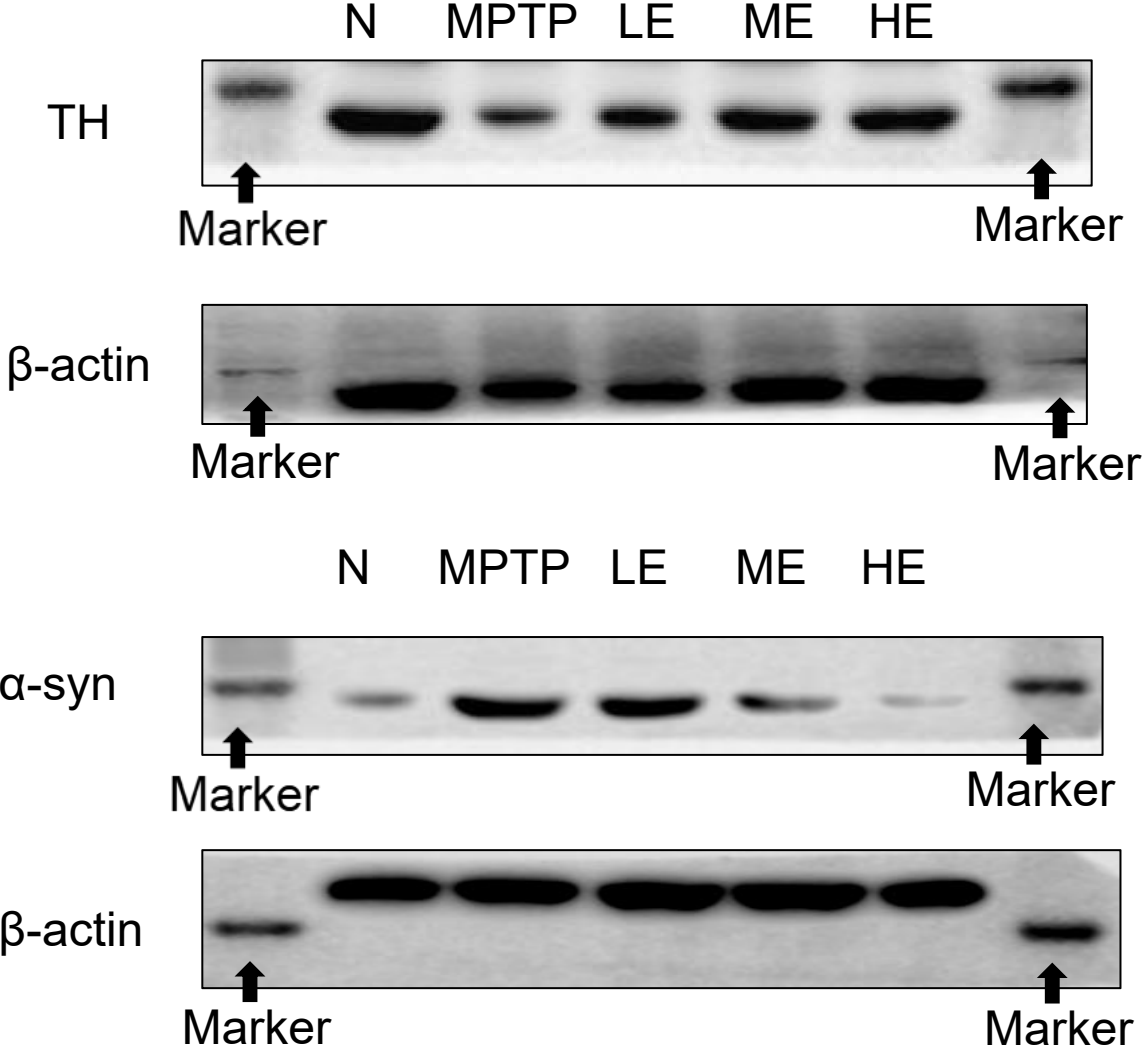

Figure 4A

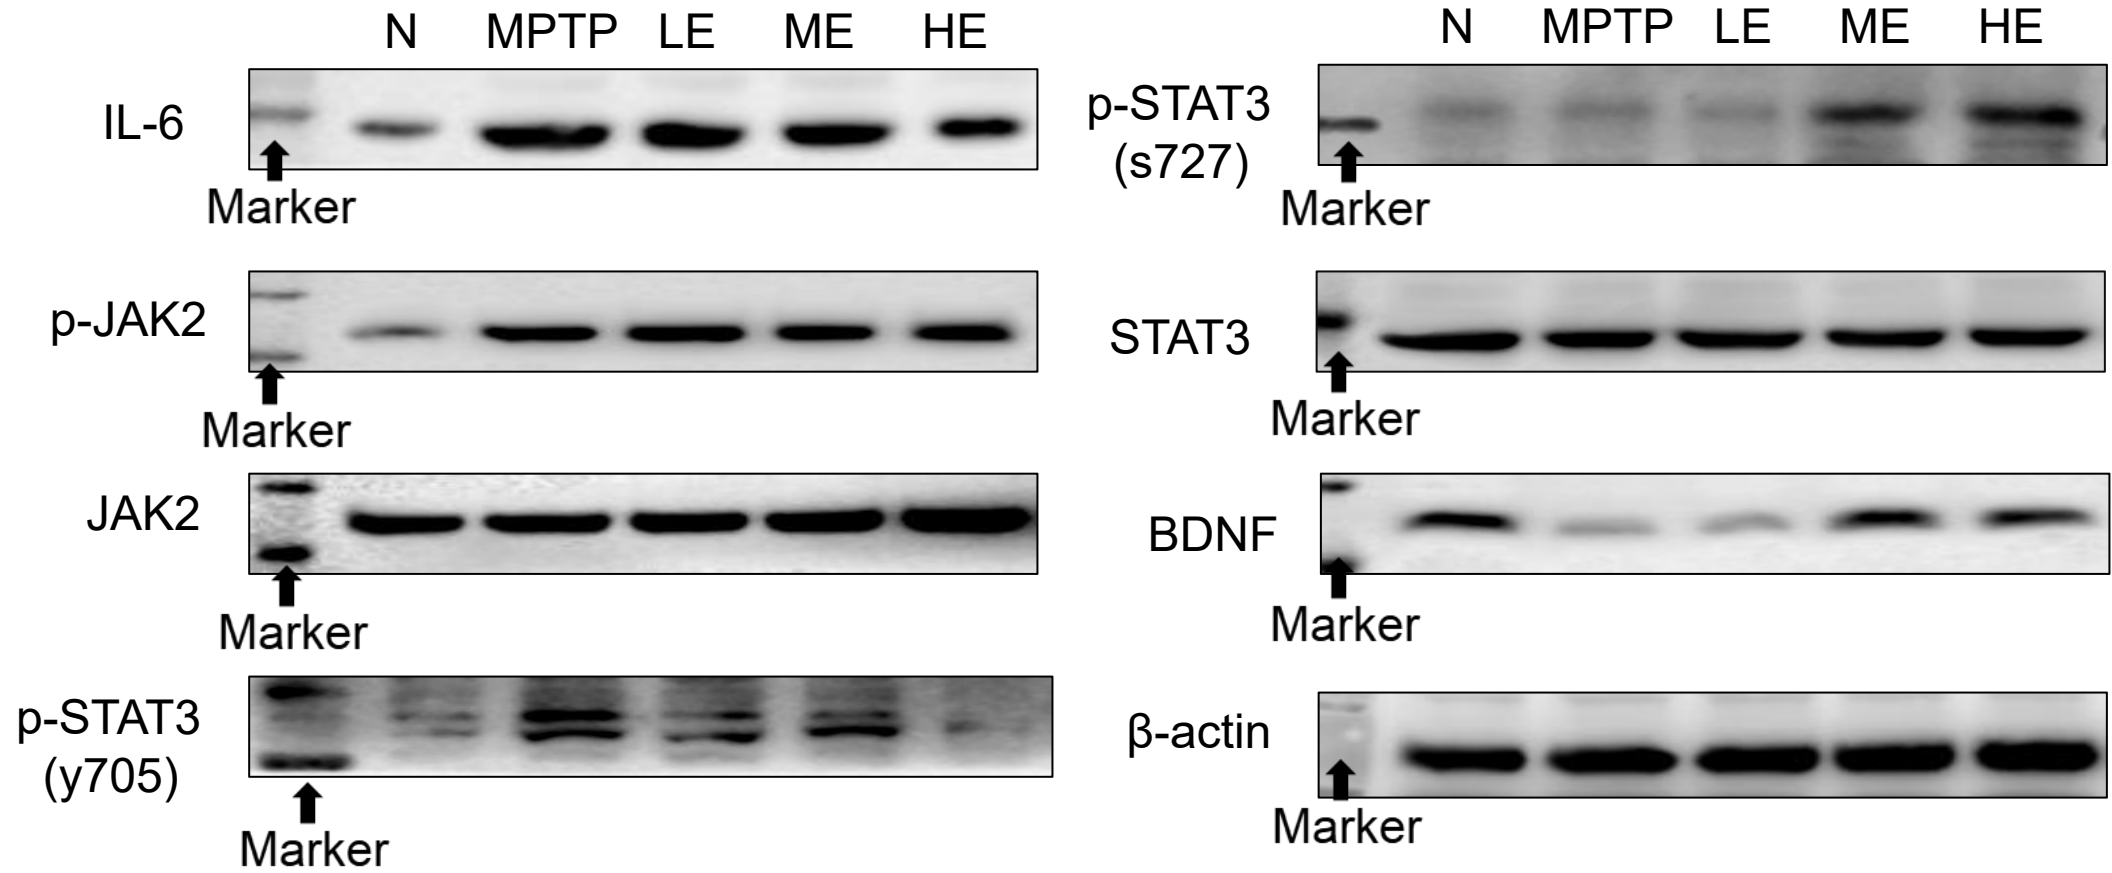

Figure 6A

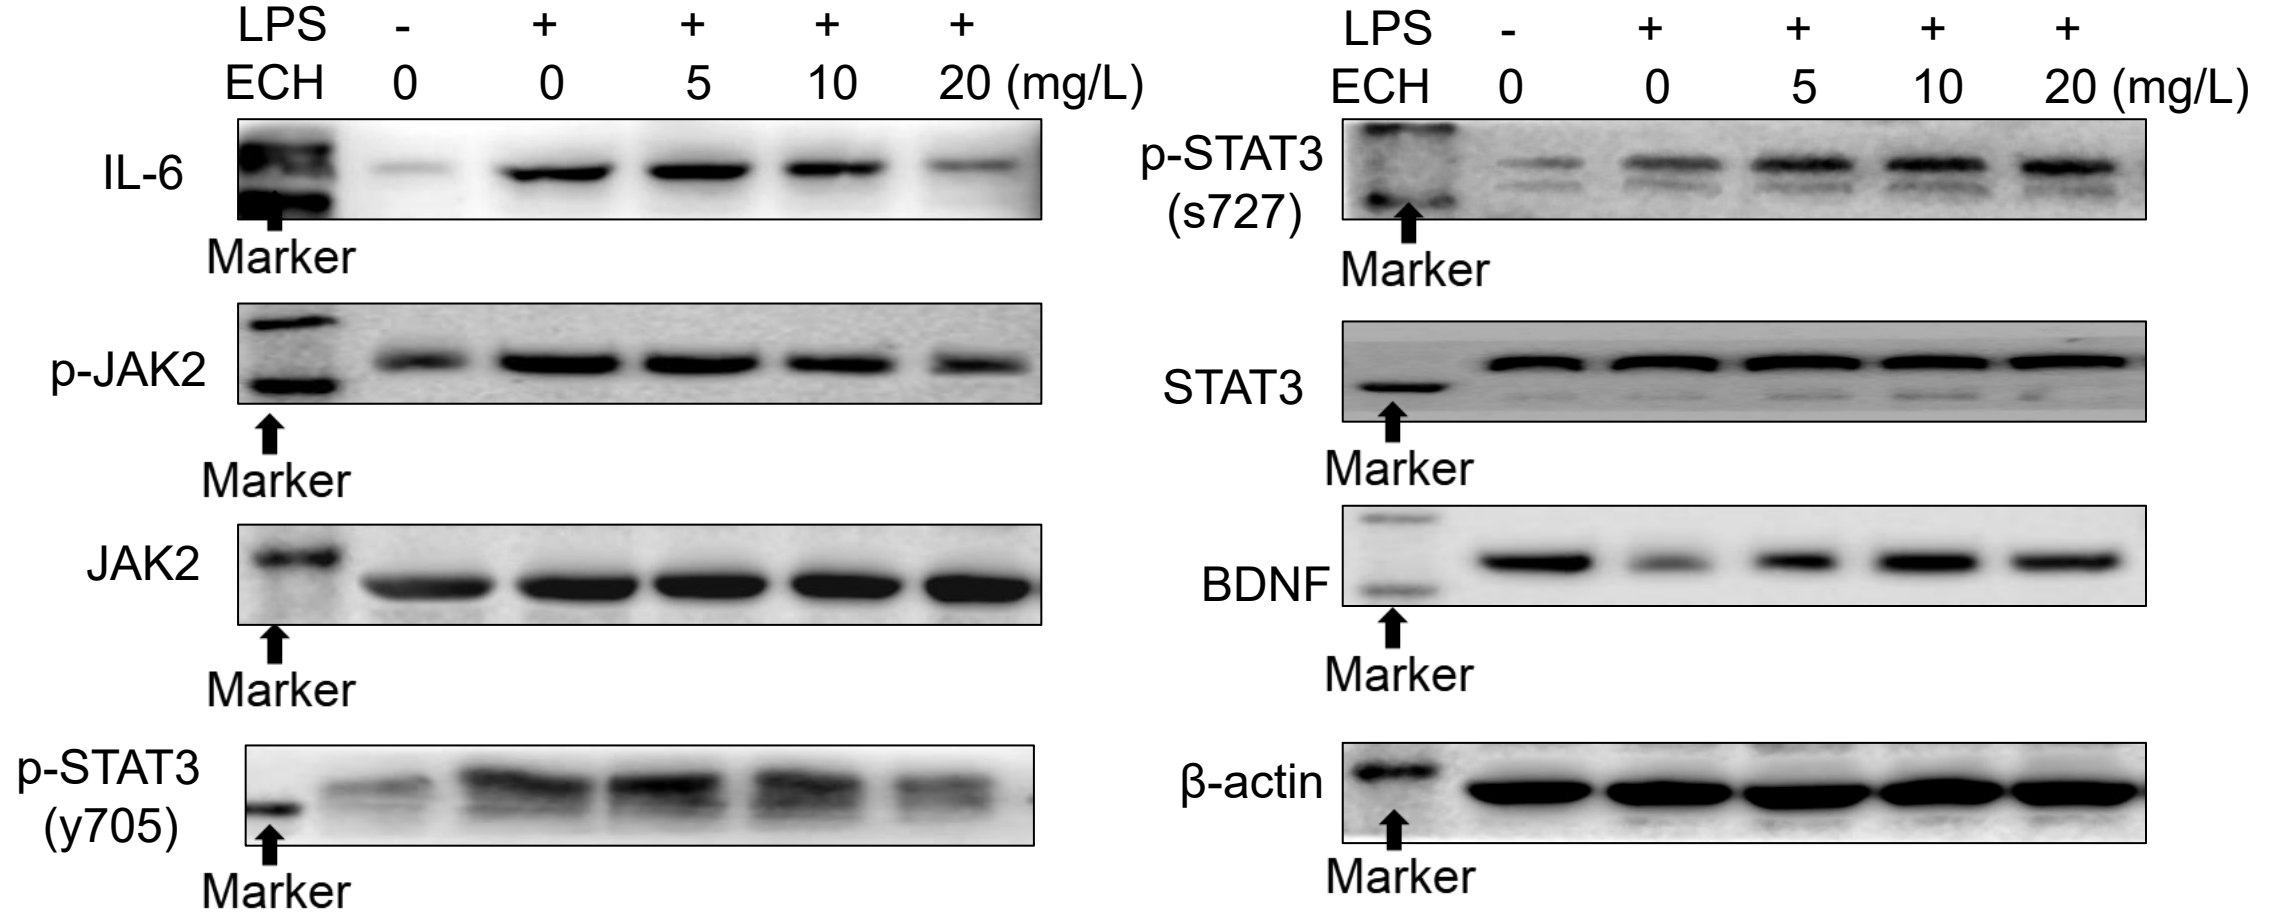

Figure 6H

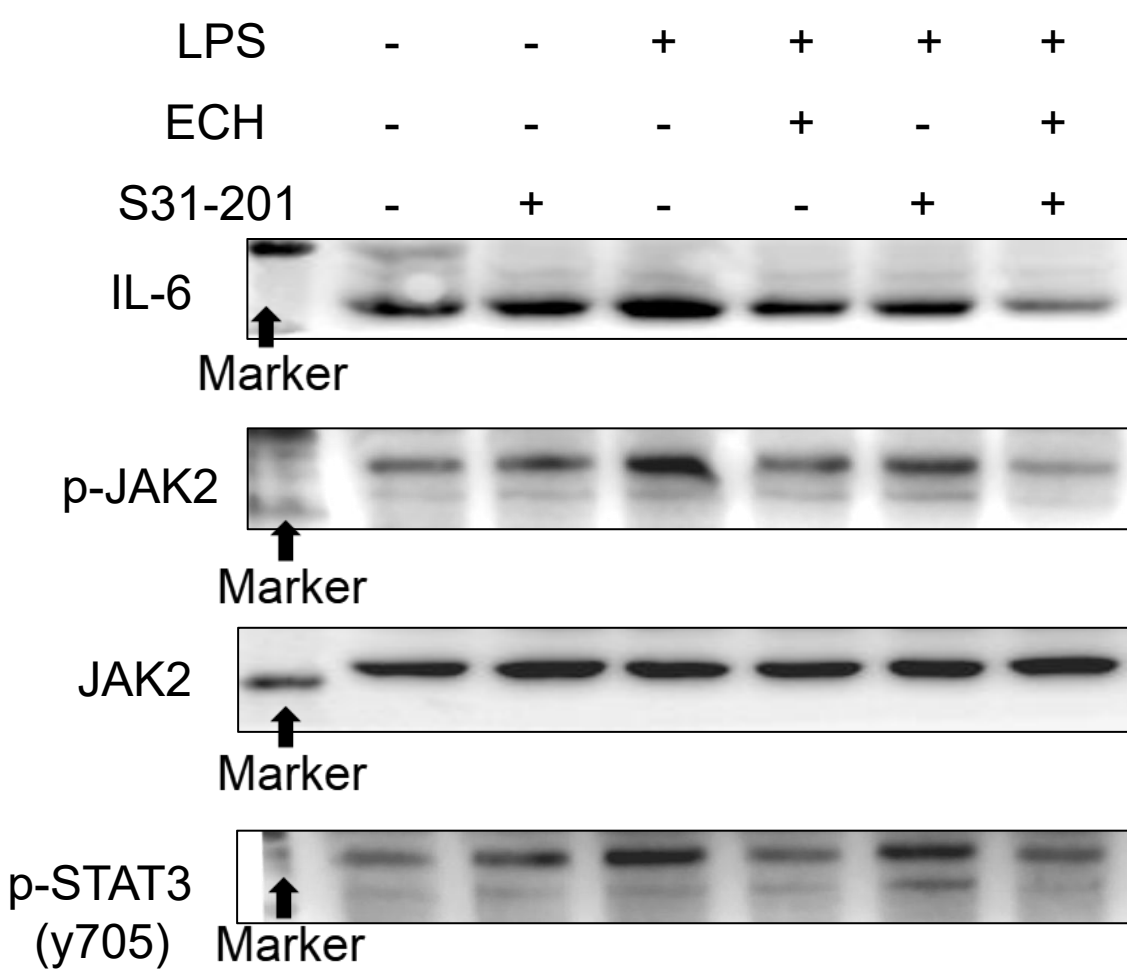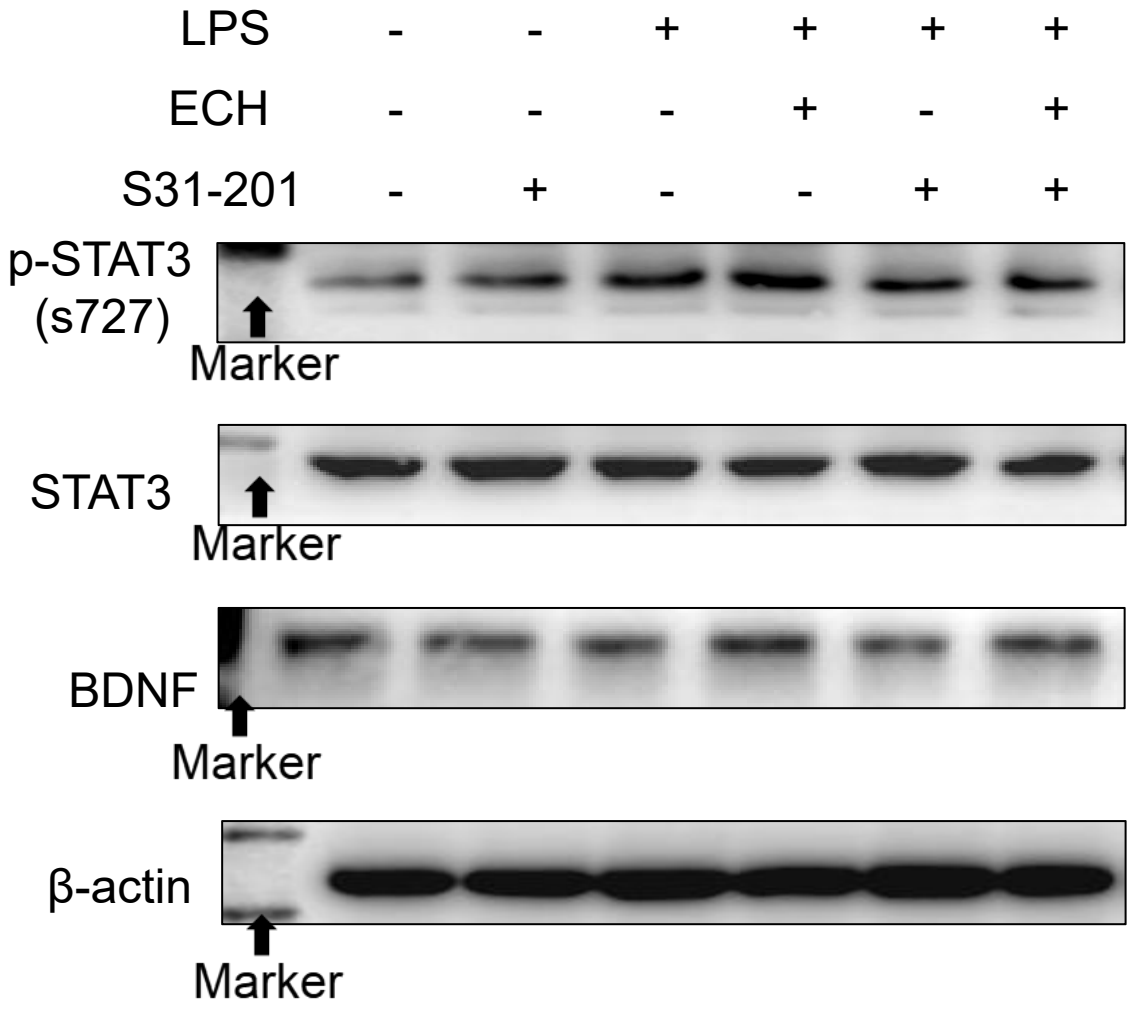

Supplement: Image1.pdf [file Image1.pdf]
